Abstract  
Posters

NEUROLOGICAL AND NEUROPSYCHIATRIC DISORDERS: OTHER

A - 077

**Relationship Between Mental Health and Physical Health and Neurocognitive Function among Latinx People Living With HIV**

*Breen E, Aghvinian M, Stiver J, Savin M, Summers A, Slaughter A, Fidaleo K, Byrd D, Rivera Mindt M*

**Objective:** The relationship between self-reported mental health (MH), physical health (PH), and neurocognition (NC) is vastly understudied among Latinx people living with HIV (PLWH). Evidence of increased somatization in this group suggests that self-reported MH and PH may contextualize cognitive outcomes among Latinx PLWH. Thus, this study examines the relationship between self-reported MH/PH and NC in a sample of Latinx PLWH. **Method:** This study included 76 Latinx PLWH (33% female; M age = 46.0, SD = 7.08) who completed the Medical Outcomes Study HIV Health Survey (MOS-HIV) and a comprehensive neurocognitive battery. MH and PH were defined by the MOS-HIV, where higher MH and PH summary scores indicate better perceived health. Demographically-corrected T-scores were used to compute average global NC and domain scores. **Results:** Within Latinx PLWH, partial correlations controlling for age and education found PH was associated with better processing speed ( $r = .28$ ,  $p = .03$ ), and MH was related to better global NC, fluency, learning, and processing speed ( $ps < .05$ ). A series of multiple regressions (Step 1: age, education, Step 2: MH, PH summary scores) were used to predict NC domain scores. MH ( $R^2 = .11-.15$ ) significantly predicted better attention/working memory ( $\beta = .26$ ,  $p = .03$ ) and global NC at the trend level ( $\beta = .19$ ,  $p = .07$ ). PH did not predict any NC domains. **Conclusions:** Findings indicate that MH and PH correlated with global and domain-specific NC within Latinx PLWH. Better self-reported MH may improve attention/working memory and global NC in Latinx PLWH. Somatization is important when considering MH/PH and cognition within Latinx PLWH; physicians should consider the impact of patients' self-reported MH/PH on NC in Latinx PLWH.
